# Supplementary material
Source: publisher figshare collection journal article supplement (https://acs.figshare.com/ndownloader/files/17918696)
Supplement: Supplementary file 2 [file 17918696]

Archive with 3 entries (3 files):
- info.xml
- ed9b00350_high_quality.mp4
- ed9b00350.pdf
