# Supplementary material
Source: publisher figshare collection journal article supplement (https://acs.figshare.com/ndownloader/files/17918696)
Supplement: Supplementary file 2 [file 17918696 › info.xml]

<presentation>
	<article>
		<title>Going Green in Process Chemistry: Optimizing an Asymmetric Oxidation Reaction to Synthesize the Anti-ulcer Drug Esomeprazole</title>
		<doi>10.1021/acs.jchemed.9b00350</doi>
		<copyright>American Chemical Society</copyright>
		<narrator>Andy Parsons</narrator>
		<contact>Andrew Parsons</contact>
		<contact-email>andy.parsons@york.ac.uk</contact-email>
		<author-list>
			<author>Andrew Parsons</author>
		</author-list>
	</article>
	<slides height-width-ratio=".75">
		<slide audio-time="28">
			<subtitle/>
		</slide>
		<slide audio-time="25">
			<subtitle/>
		</slide>
		<slide audio-time="38">
			<subtitle/>
		</slide>
		<slide audio-time="17">
			<subtitle/>
		</slide>
		<slide audio-time="43">
			<subtitle/>
		</slide>
		<slide audio-time="18">
			<subtitle/>
		</slide>
		<slide audio-time="53">
			<subtitle/>
		</slide>
	</slides>
	<audio duration="222"/>
</presentation>
